# Supplementary material
Source: publisher figshare collection journal article supplement (https://frontiersin.figshare.com/ndownloader/files/10667188)
Supplement: Supplementary file 1 [file 10667188]

| **Library Name** | **Species** | **SSWD State** | **Location** | **Collection Date** | **# Reads** | **# Contigs** | **# RNA Viral Contigs** |
| --- | --- | --- | --- | --- | --- | --- | --- |
| ONP2 | *Pisaster ochraceus* | Asymptomatic | Olympic National Park | 10/20/2013 | 4,670,920 | 4,878 | 34 |
| ONP3 | *Pisaster ochraceus* | Asymptomatic | Olympic National Park | 10/20/2013 | 4,195,732 | 2,518 | 4 |
| ONP4 | *Pisaster ochraceus* | Symptomatic | Olympic National Park | 10/20/2013 | 4,517,636 | 3,922 | 17 |
| SCD6 | *Pisaster ochraceus* | Symptomatic | Scott Creek, Santa Cruz | 10/8/2013 | 359,586 | 4,862 | 2 |
| SCD7 | *Pisaster ochraceus* | Symptomatic | Scott Creek, Santa Cruz | 10/8/2013 | 4,032,748 | 1,305 | 2 |
| SCD8 | *Pisaster ochraceus* | Symptomatic | Scott Creek, Santa Cruz | 10/8/2013 | 3,923,730 | 2,471 | 13 |

**Supplemental Table 6:** Library characteristics of RNA metaviromes prepared from *P. ochraceus*.
